# Supplementary material for: A Hemagglutinin Stem Vaccine Designed Rationally by AlphaFold2 Confers Broad Protection against Influenza B Infection
Source: MDPI journal article supplement (doi:10.3390/v14061305), 2022-06-14
Supplement: s1 [file s1]

Amino Sequence: B/Brisbane/60/2008  
 DRICTGITSSNSPHVVKATATQGEVNTGVIPLTTTPTKSHFANLKGTETRGKLCPKCLNCTDL DVALGRPKCTG  
 KIP SARVSILHEVRPVTS GCFPI MHDR TKIRQLPNLLRGYE HIRLSTHN VINAENAPGGPYKIGTS GSCP NITNG  
 NGFFATMAWAVPKNDKNKTATNPLTIEVPYICTEGEDQITVWGFHSDNETQMAKLYGDSKPQKFTSSANGVT  
 THYVSQIGGFNPQTEDGGLPQSGRIVVDYMVQKSGKTGTITYQRGILLPQKVWCASGRSKVIKGS LPLIG EAD  
 CLHEKYGGLNKS KPYTGEHAKAIGNCPIWVK TPLKLANGTKYRPPAKLLKERGFFGA IAGFLEGGWEGMIAG  
 WHGYTSHGAHGVAVAADLKSTQEAINKITKNLNSLSELEVKNLQRLSGAMDELHNEILELDEKVDDL RADTISS  
 QIELAVLLSNEGIINSEDEHLLALERKLKMLGPSAVEIGNGCFETKHKCNQTCLDRIAAGTFDAGEFSLPTFDS  
 LNITAASSGR

Amino Sequence: B60-Stem  
 MDRICTGITSSNSPHVVKATATQGEVNTGVIPLTTTPTGSANKSKPYTGEHTKTTGNSPIWVCTPLKLANGTK  
 YGSAGSATQEAINKITKNLNSLSELEVKNQQRSSGAMDEDHNEILELDEKVDDL RADTIC SQIELAVLLSNEGI  
 NSEDEQGTGGGYIPEAPRDGQAYVRKDGEWVLLSTFLHHHHHHHHH

Amino Sequence: B60-Stem-8033  
 MDRICTGITSSNSPHVVKATATQGEVNTGVIPLTTTPTGSAKIGTS GSCP NITNGNGFFATMAWAVPKNGSAQ  
 MAKLG SALPQSNKSKPYTGEHTKTTGNSPIWVCTPLKLANGTKYGSAGSATQEAINKITKNLNSLSELEVKN  
 QQRSSGAMDEDHNEILELDEKVDDL RADTIC SQIELAVLLSNEGIINSEDEQGTGGGYIPEAPRDGQAYVRKD  
 EWVLLSTFLHHHHHHHHH

Amino Sequence: B60-Stem-12G6  
 MDRICTGITSSNSPHVVKATATQGEVNTGVIPLTTTPTGSAPIKIGTS GSCP NITNGNGFFATMAWAVPKNDGG  
 GGS HSDDETQMAKLG GGGSLPQSGGSANKSKPYTGEHTKTTGNSPIWVCTPLKLANGTKYGSAGSATQE  
 AINKITKNLNSLSELEVKNQQRSSGAMDEDHNEILELDEKVDDL RADTIC SQIELAVLLSNEGIINSEDEQGTGGGY  
 IPEAPRDGQAYVRKDGEWVLLSTFLHHHHHHHHH

Amino Sequence: B60-Stem-SD84  
 MDRICTGITSSNSPHVVKATATQGEVNTGVIPLTTTPTGSA RLSTHN VINAENAPGGPYKIGTS GGGGSLNGVTT  
 GSANKSKPYTGEHTKTTGNSPIWVCTPLKLANGTKYGSAGSATQEAINKITKNLNSLSELEVKNQQRSSGAM  
 DE DHNEILELDEKVDDL RADTIC SQIELAVLLSNEGIINSEDEQGTGGGYIPEAPRDGQAYVRKDGEWVLLSTFL  
 HHHHHHHHHH

Amino Sequence: B60-Stem-46B8  
 MDRICTGITSSNSPHVVKATATQGEVNTGVIPLTTTPTGSA AKSLN GGGGSLSLPLIGGSANKSKPYTGEHTK  
 TTGNSPIWVCTPLKLANGTKYGSAGSATQEAINKITKNLNSLSELEVKNQQRSSGAMDEDHNEILELDEKVDDL  
 RADTIC SQIELAVLLSNEGIINSEDEQGTGGGYIPEAPRDGQAYVRKDGEWVLLSTFLHHHHHHHHH

Amino Sequence: B60-Stem-8071  
 MDRICTGITSSNSPHVVKATATQGEVNTGVIPLTTTPTKSHFANLKGTETRGKLCPKCLNCTDL DVALGRPKCT  
 GKIP SARVSILHEVRPVGSA GSLPLIG EADCLHEKYGGLNKS KPYTGEHTKTTGNSPIWVCTPLKLANGTKY  
 GSAGSATQEAINKITKNLNSLSELEVKNQQRSSGAMDEDHNEILELDEKVDDL RADTIC SQIELAVLLSNEGIINSE  
 DEQGTGGGYIPEAPRDGQAYVRKDGEWVLLSTFLHHHHHHHHH

**Figure S1.** Construct design and diagrams of HA stem. Sequences of full length, B60-Stem, B60-Stem-8033(blue), B60-Stem-12G6(yellow), B60-Stem-SD84(purple), B60-Stem-46B8(red) and B60-Stem-8071(yellow).

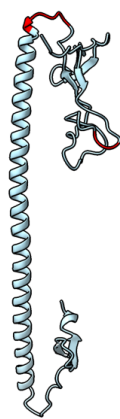

**Figure S2.** The prediction model of B60-Stem monomer by AlphaFold2. GSA linker was colored red.

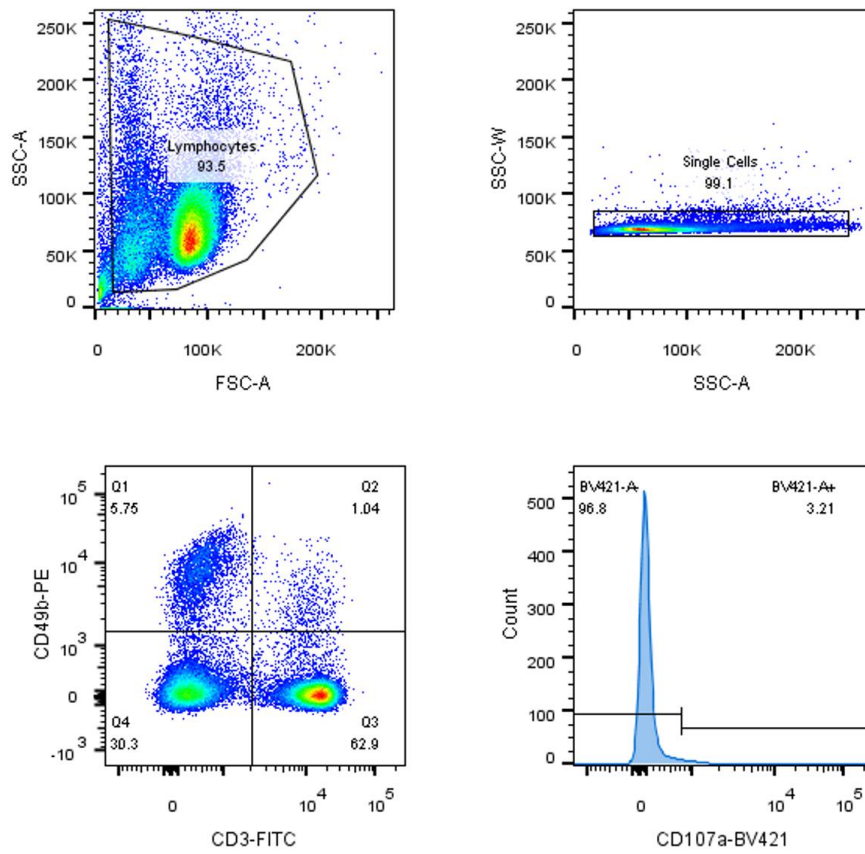

**Figure S3.** The gating strategy of NK cell activation by FACS. (A) PBMCs isolated from NC group mice, and the cells were stained with anti-mouse antibody FITC-antiCD3, PE-antiCD49b and BV421-antiCD107a.

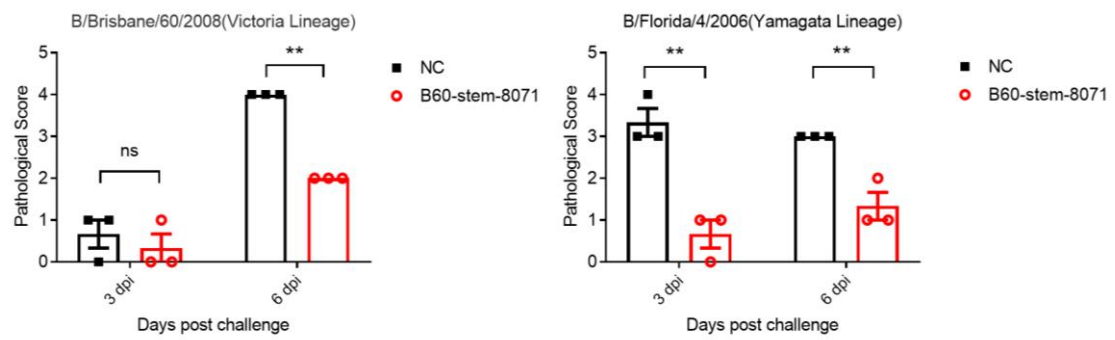

**Figure S4.** Histological scoring is shown as mean  $\pm$  SEM ( $n = 3$  mice) with asterisks representing significant differences Significance (\* $p < 0.05$ , \*\* $p < 0.01$ ).

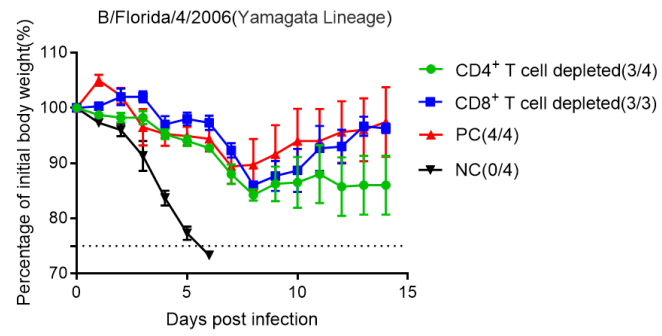

**Figure S5.** Body weight loss of mice vaccinated with B60-stem-8071 were treated with anti-CD4<sup>+</sup> (in green) or anti-CD8<sup>+</sup> T cells antibodies (in blue) after intranasal infection with B/Florida/4/2006.
